# Supplementary material
Source: HighWire-hosted journal article supplement (https://cmaj.ca/highwire/filestream/149988/field_highwire_adjunct_files/0/231014-res-1-at.pdf)
Supplement: 231014-res-1-at.pdf [file 231014-res-1-at.pdf]

**eTable 1. *International Statistical Classification of Diseases and Related Health Problems, 10<sup>th</sup> Revision*, diagnosis codes for opioid toxicity events**

| <b><i>International Statistical Classification of Diseases and Related Health Problems (10<sup>th</sup> revision) diagnosis codes</i></b> | <b>Diagnosis code description</b>            |
|-------------------------------------------------------------------------------------------------------------------------------------------|----------------------------------------------|
| T40.0                                                                                                                                     | Poisoning by opium                           |
| T40.1                                                                                                                                     | Poisoning by heroin                          |
| T40.2                                                                                                                                     | Poisoning by other opioids                   |
| T40.3                                                                                                                                     | Poisoning by methadone                       |
| T40.4                                                                                                                                     | Poisoning by other synthetic narcotics       |
| T40.6                                                                                                                                     | Poisoning by unspecified and other narcotics |

**eTable 2. Opioid use disorder (OUD) definition**

|                                                                                                                                          |                                                                                                                                                                                                                                                                                                            |
|------------------------------------------------------------------------------------------------------------------------------------------|------------------------------------------------------------------------------------------------------------------------------------------------------------------------------------------------------------------------------------------------------------------------------------------------------------|
| <p><b>OUD was defined as anyone who had any of the following events occur in the 5 years prior to index hospital encounter date:</b></p> | <p>ICD-10 (DAD, NACRS, OMHRS): F11 (mental and behavioural disorders due to use of opioids)</p>                                                                                                                                                                                                            |
|                                                                                                                                          | <p>ICD-9 (Ontario Health Insurance Program): 304 (drug dependence, drug addiction)</p>                                                                                                                                                                                                                     |
|                                                                                                                                          | <p>ICD-9 (OMHRS): 304 (opioid dependence-unspecified), 305.5 (opioid abuse-unspecified)</p>                                                                                                                                                                                                                |
|                                                                                                                                          | <p>OHIP Fee code (Ontario Health Insurance Program): K682 (opioid agonist maintenance program monthly management fee – intensive), K683 (opioid agonist maintenance program monthly management fee – maintenance), K684 (opioid agonist maintenance program monthly management fee - team maintenance)</p> |
|                                                                                                                                          | <p>Prescription for methadone or buprenorphine/naloxone</p>                                                                                                                                                                                                                                                |

**eTable 3. OAT initiation from 0-7 days after hospital discharge for opioid toxicity**

| <b>Days following discharge from hospital</b> | <b>Frequency of OAT initiation events</b> | <b>Percentage of OAT initiation events</b> |
|-----------------------------------------------|-------------------------------------------|--------------------------------------------|
| Day 0 (day of discharge)                      | 127                                       | 14.9                                       |
| Day 1                                         | 180                                       | 21.2                                       |
| Day 2                                         | 125                                       | 14.7                                       |
| Day 3                                         | 95                                        | 11.2                                       |
| Day 4                                         | 88                                        | 10.3                                       |
| Day 5                                         | 101                                       | 11.9                                       |
| Day 6                                         | 70                                        | 8.2                                        |
| Day 7                                         | 65                                        | 7.6                                        |

**eTable 4. Results of monthly and quarterly ARIMA models examining the association between rate of OAT initiation and the release of OUD clinical management guidelines**

|                              | <b>Model 1: Overall OAT initiation</b> |                          |                | <b>Model 2: Methadone initiation</b> |                          |                | <b>Model 3: Buprenorphine initiation</b> |                          |                |
|------------------------------|----------------------------------------|--------------------------|----------------|--------------------------------------|--------------------------|----------------|------------------------------------------|--------------------------|----------------|
| <b>Quarterly ARIMA model</b> | <b>Model (p, d, q)</b>                 | <b>Estimate (95% CI)</b> | <b>p-value</b> | <b>Model (p, d, q)</b>               | <b>Estimate (95% CI)</b> | <b>p-value</b> | <b>Model (p, d, q)</b>                   | <b>Estimate (95% CI)</b> | <b>p-value</b> |
|                              | (5, 1, 0)                              | 0.14 (-0.11, 0.38)       | 0.3            | (2, 1, 0)                            | 0.07 (-0.12, 0.25)       | 0.5            | (2, 1, 0)                                | 0.04 (-0.26, 0.34)       | 0.8            |
| <b>Monthly ARIMA model</b>   | <b>Model (p, d, q)</b>                 | <b>Estimate (95% CI)</b> | <b>p-value</b> | <b>Model (p, d, q)</b>               | <b>Estimate (95% CI)</b> | <b>p-value</b> | <b>Model (p, d, q)</b>                   | <b>Estimate (95% CI)</b> | <b>p-value</b> |
|                              | (5, 1, 0)                              | 0.05 (-0.14, 0.25)       | 0.6            | (5, 1, 0)                            | 0.03 (-0.08, 0.14)       | 0.6            | (5, 1, 0)                                | 0.01 (-0.12, 0.15)       | 0.8            |

Abbreviations: OAT, opioid agonist therapy; OUD, opioid use disorder; ARIMA, autoregressive integrated moving average; CI, confidence in Model specification represented as (p, d, q): p is the number of lags of the dependent variable, representing the autoregressive nature of the model; d represents the number of times the data have to be differenced to ensure stationarity, and q is the number of lags for the error term, representing the moving average part of the model. Note that stationarity for all models was confirmed using the augmented Dickey-Fuller test.

**Figure 1. Overall OAT initiation rate 0-1 days after an opioid toxicity event resulting in hospitalization or emergency department visit**

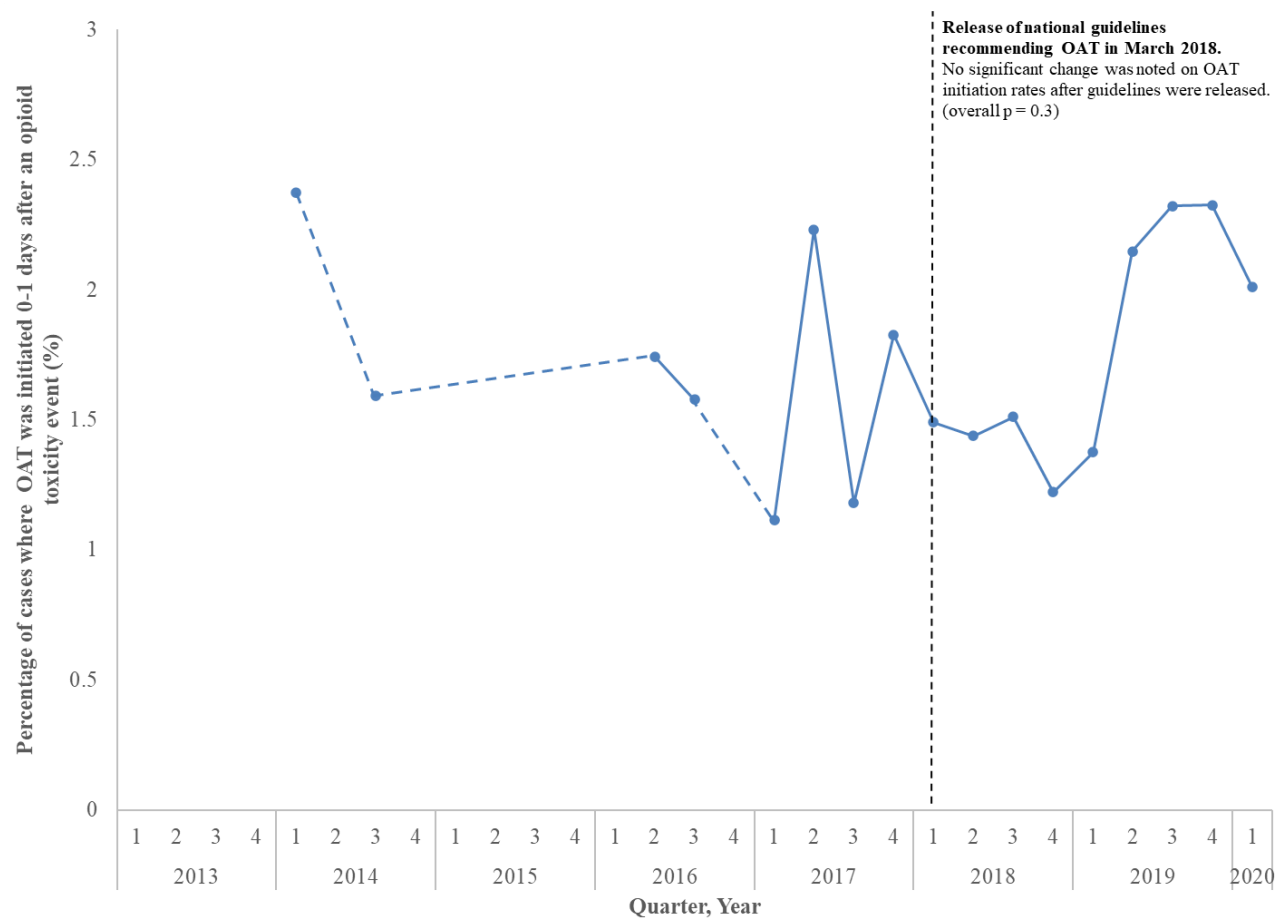

Note: Dashed lines are used to connect data points where event counts  $\leq 5$  have led to suppression of quarterly data.
